# Supplementary material
Source: ML conference proceedings conference paper supplement (https://proceedings.mlr.press/v119/loynd20a.html)
Supplement: Supplementary file [file loynd20a-supp.pdf]

# Appendices

## A. Pathfinding Task Details

The Pathfinding graph is constrained to be a polytree (singly connected, directed acyclic graph) at each step of an episode, as outlined in Algorithm 1.

---

### Algorithm 1 Pathfinding Episode Dynamics

---

**Input:** pattern size  $D$ , max graph size  $N$ .  
Initialize  $Graph = empty$ .  
Add a node with random pattern  $\in (-1, +1)^D$ .  
 $AddPattern = true$ .  
**repeat**  
  **Input:** agent  $Action$ .  
   $Reward = 0$ .  
   $Done = false$ .  
  **if**  $AddPattern$  is  $true$  **then**  
    // Construction step.  
    **if**  $size(Graph) > 1$  and  $Action == Target$  **then**  
       $Reward = 1$ .  
    **end if**  
    **if**  $size(Graph) == N$  **then**  
       $Done = true$ .  
    **else**  
      Choose random node  $A$  from the Graph.  
      Add node  $B$  with random pattern  $\in (-1, +1)^D$ .  
      Link  $A$  and  $B$  in a random direction.  
       $Observation = A, B, 0$ .  
       $AddPattern = false$ .  
    **end if**  
  **else**  
    // Quiz step.  
    Choose random  $Target \in (true, false)$ .  
    **repeat**  
      Choose random nodes  $X$  and  $Y$ .  
       $PathExists = path$  exists from  $X$  to  $Y$ .  
    **until**  $PathExists == Target$   
     $Observation = X, Y, 1$ .  
     $AddPattern = true$ .  
  **end if**  
  **Output:**  $Reward, Observation, Done$   
**until**  $Done$  is  $true$

---

The hand-coded baseline agent is configured with a depth parameter  $n$ . As new pattern pairs are revealed on graph-construction timesteps, this agent maintains a growing vector of all patterns seen, along with a growing matrix of directed path lengths from every observed pattern to every other. A path length of zero in this matrix indicates that no path exists from the first pattern to the second. On each quiz step, the agent looks up from the matrix the path length  $len$  for the ordered pair of patterns in the observation. If

$0 < len \leq n$ , the agent chooses the *yes* action. Otherwise, the agent chooses the *no* action.

## B. Hyperparameter Tuning Procedures

### B.1. DGD

In this work, all hyperparameters were tuned by a guided form of random search that we have named *Distributed Grid Descent* (DGD). It is designed to address the challenges posed by large numbers of hyperparameters (10-20), and the high variance among independent training runs for the same hyperparameter configuration that is often observed in Deep RL experiments. DGD tackles these challenges by steering the random selection of configurations to be tested towards a robust basin, a fixed point in configuration space for which modification of any individual (discrete) hyperparameter setting by one step higher or lower results in worse performance in expectation over repeated runs. In addition, DGD is designed to run on multiple processes on potentially many machines with no central point of control.

We define the following terms:

*Tuning metric:* A user-defined value calculated per training run for which higher is better, such as reward or success rate, or negative loss, etc.

*Run result:* A completed run’s hyperparameter configuration and final tuning metric.

*Run set:* A single hyperparameter configuration, along with any available run results for that configuration.

*Count(run set):* The number of runs in a run set.

*Metric(run set):* The mean (or median) of the run metrics in a run set.

*Neighborhood:* A collection of run sets with configurations that differ by no more than one step in one setting from the configuration of a central run set in the neighborhood.

*Count(neighborhood):* The maximum *Count* of all run sets in the neighborhood.

The operation of each DGD worker process is described by Algorithm 2.

Throughout the DGD search, the *best* current run set is determined through Bayesian inference based on each run set’s *Metric* and *Count*, to filter out high-variance run sets having high average scores but relatively few runs. After the best posterior performance remains stable for some number of runs, the DGD search is terminated, and the best run set’s hyperparameter configuration is taken as the output of the search. To minimize the effects of local optima, the best run set can be chosen from a number of independent DGD searches.

**Algorithm 2** Distributed Grid Descent

**Input:** Set of hyperparameters  $H$ , each having a discrete, ordered set of possible values.

**Input:** Maximum number of training steps  $N$  per run.

**repeat**

**Download** any new run results.

**if** no results so far **then**

**Choose** a random configuration  $C$  from the grid defined by  $H$ .

**else**

**Identify** the run set  $S$  with the highest *Metric*.

**Initialize** neighborhood  $B$  to contain only  $S$ .

**Expand**  $B$  by adding all possible run sets whose configurations differ from that of  $S$  by one step in exactly one hyperparameter setting.

**Calculate** a ceiling  $M = \text{Count}(B) + 1$ .

**Weight** each run set  $x$  in  $B$  by  $M - \text{Count}(x)$ .

**Sample** a random run set  $S'$  from  $B$  according to run set weights.

**Choose** the configuration  $C$  from  $S'$ .

**end if**

**Perform** one training run of  $N$  steps using  $C$ .

**Calculate** the run's *Metric*.

**Log** the run result to shared storage.

**until** terminated by user.

in the Microsoft Azure cloud. The virtual machines featured Intel 2.6GHz Xeon E5 2667 v3 processors with 8 virtual CPUs, and no GPUs.

## B.2. Application of DGD

For the Pathfinding and BabyAI experiments, we ran five parallel DGD hyperparameter searches to convergence for each model, using the full number of training steps per run for the given experiment, and chose the best run set's hyperparameter configuration after convergence.

For WMG on Sokoban, we performed 60 DGD searches using training runs of 1.5M steps, with puzzle completion rate as the tuning metric. After those searches converged, we selected the best 25 configurations based on the training set results, and initiated 20 new training runs for each configuration. After training each agent for 10M environment interactions, we selected the single best hyperparameter configuration based on its performance on the training set. We then branched this configuration into 10 sets of runs with learning rate annealed every 100k steps using one of 10 separate values of gamma ranging from 0.6 to 0.98. After each agent was trained for a total of 20 million environment interactions, the annealing rate of 0.98 was found to perform the best on the training set. Finally, for this selected configuration's 20 independent agents, the models cached at 5M-step intervals were evaluated on the held-out test set of 1000 puzzles, producing the results shown in Figure 6 (right).

All experiments were performed on Linux virtual machines

## C. Supplemental Tables

Table 2. Fixed settings and options used for all experiments, apart from the replicated BabyAI baselines in Table 15.

| Settings and options                       | Values                                     |
|--------------------------------------------|--------------------------------------------|
| Dropout                                    | None                                       |
| Learning rate schedule                     | Constant learning rate, except where noted |
| Non-linearities                            | ReLU, tanh                                 |
| Parallel training workers                  | 1                                          |
| Optimizer                                  | Adam (Kingma & Ba, 2014)                   |
| Parameter initialization, biases           | 0                                          |
| Parameter initialization, non-bias weights | Kaiming uniform (He et al., 2015)          |
| Reward shaping                             | None                                       |
| Training algorithm                         | A3C (Mnih et al., 2016)                    |
| Weight decay regularization                | None                                       |

Table 3. Hyperparameter values considered.

|                                  |                                                                              |
|----------------------------------|------------------------------------------------------------------------------|
| A3C $t_{max}$                    | 1, 2, 3, 4, 6, 8, 10, 12, 16, 20, 24, 28, 32, 40, 48, 56, 64, 96, 120        |
| Actor-critic hidden layer size   | 64, 90, 128, 180, 256, 360, 512, 720, 1024, 1440, 2048, 2880, 4096, 5760     |
| Adam eps                         | 1e-2, 1e-4, 1e-6, 1e-8, 1e-10, 1e-12                                         |
| CNN channel size 1               | 12, 16, 20                                                                   |
| CNN channel size 2               | 24, 32, 40                                                                   |
| CNN channel size 3               | 64, 128, 192                                                                 |
| Discount factor $\gamma$         | 0.5, 0.6, 0.7, 0.8, 0.9, 0.95, 0.98, 0.99, 0.995, 0.998                      |
| Entropy term strength $\beta$    | 0.0, 0.002, 0.005, 0.01, 0.02, 0.05, 0.1, 0.2                                |
| Gradient clipping threshold      | 2, 4, 8, 16, 32, 64, 128, 256, 512, 1024, 2048                               |
| GRU observation embed size       | 128, 256, 512, 1024, 2048, 4096                                              |
| GRU size                         | 64, 96, 128, 192, 256, 384, 512, 768, 1024                                   |
| Learning rate                    | 4e-6, 6.3e-6, 1e-5, 1.6e-5, 2.5e-5, 4e-5, 6.3e-5, 1e-4, 1.6e-4, 2.5e-4, 4e-4 |
| Learning rate annealing $\gamma$ | 0.60, 0.64, 0.68, 0.72, 0.76, 0.80, 0.84, 0.88, 0.93, 0.98                   |
| Reward on success (Sokoban)      | 2, 5, 10, 15, 20                                                             |
| Reward per step (Sokoban)        | 0, -0.01, -0.02                                                              |
| Reward scale factor              | 0.25, 0.5, 1, 2, 4, 8, 16, 32, 64, 128                                       |
| WMG attention head size          | 8, 12, 16, 24, 32, 48, 64, 90, 128, 180, 256, 360, 512                       |
| WMG attention heads              | 1, 2, 3, 4, 6, 8, 10, 12, 16, 20                                             |
| WMG Memo size                    | 32, 45, 64, 90, 128, 180, 256, 360, 512, 720, 1024, 1440, 2048               |
| WMG Memos                        | 1, 2, 3, 4, 6, 8, 10, 12, 16, 20                                             |
| WMG hidden layer size            | 6, 8, 12, 16, 24, 32, 48, 64, 96, 128, 192, 256, 384, 512                    |
| WMG layers                       | 1, 2, 3, 4, 5, 6, 7, 8, 9, 10, 11, 12, 13                                    |

For the Pathfinding domain, we verified in separate experiments that there is no difference in performance between setting the number of WMG Memos to 12 (the maximum episode length) or 16 (chosen by tuning). Since we introduce no penalty for model complexity, both DGD and random search would be expected to choose randomly between these possible values.

## Working Memory Graphs

Table 4. Tuned hyperparameter settings for Pathfinding experiments of 20M steps.

|                                | WMG     | nr-WMG  | GRU    |
|--------------------------------|---------|---------|--------|
| Actor-critic hidden layer size | 128     | 128     | 512    |
| A3C $t_{max}$                  | 16      | 16      | 16     |
| Adam eps                       | 1e-06   | 1e-08   | 1e-08  |
| Discount factor $\gamma$       | 0.5     | 0.6     | 0.5    |
| Entropy term strength $\beta$  | 0.01    | 0.005   | 0.02   |
| Gradient clipping threshold    | 16.0    | 16.0    | 4.     |
| GRU observation embedding size | -       | -       | 256    |
| GRU size                       | -       | -       | 384    |
| Learning rate                  | 0.00016 | 0.00016 | 0.0001 |
| Reward scale factor            | 2.0     | 1.0     | 0.5    |
| WMG attention head size        | 12      | 16      | -      |
| WMG attention heads            | 6       | 6       | -      |
| WMG Memos                      | 16      | 0       | -      |
| WMG Memo size                  | 128     | -       | -      |
| WMG hidden layer size          | 12      | 32      | -      |
| WMG layers                     | 4       | 4       | -      |

Table 5. Tuned hyperparameter settings for Pathfinding experiments of 1M steps.

|                                | WMG     | nr-WMG  | GRU    |
|--------------------------------|---------|---------|--------|
| Actor-critic hidden layer size | 2880    | 256     | 5760   |
| A3C $t_{max}$                  | 16      | 16      | 16     |
| Adam eps                       | 1e-04   | 1e-12   | 1e-06  |
| Discount factor $\gamma$       | 0.5     | 0.5     | 0.5    |
| Entropy term strength $\beta$  | 0.005   | 0.05    | 0.1    |
| Gradient clipping threshold    | 256.0   | 4.0     | 32.    |
| GRU observation embedding size | -       | -       | 1024   |
| GRU size                       | -       | -       | 256    |
| Learning rate                  | 0.00004 | 0.00016 | 0.0001 |
| Reward scale factor            | 4.0     | 2.0     | 2.0    |
| WMG attention head size        | 90      | 90      | -      |
| WMG attention heads            | 4       | 1       | -      |
| WMG Memos                      | 6       | 0       | -      |
| WMG Memo size                  | 256     | -       | -      |
| WMG hidden layer size          | 8       | 16      | -      |
| WMG layers                     | 3       | 5       | -      |

Table 6. Tuned hyperparameter settings for BabyAI Level 1 - GoToObj.

|                                | WMG<br>factored | nr-WMG<br>factored | GRU<br>factored | WMG<br>flat | GRU<br>flat | CNN+GRU<br>native 7x7x3 |
|--------------------------------|-----------------|--------------------|-----------------|-------------|-------------|-------------------------|
| Actor-critic hidden layer size | 2048            | 4096               | 4096            | 4096        | 2048        | 512                     |
| A3C $t_{max}$                  | 1               | 1                  | 6               | 16          | 4           | 6                       |
| Adam eps                       | 0.0001          | 1e-08              | 1e-08           | 1e-10       | 0.0001      | 1e-10                   |
| CNN hidden channel size 1      | -               | -                  | -               | -           | -           | 16                      |
| CNN hidden channel size 2      | -               | -                  | -               | -           | -           | 40                      |
| CNN hidden channel size 3      | -               | -                  | -               | -           | -           | 192                     |
| Discount factor $\gamma$       | 0.98            | 0.9                | 0.7             | 0.6         | 0.9         | 0.8                     |
| Entropy term strength $\beta$  | 0.002           | 0.05               | 0.01            | 0.005       | 0.02        | 0.02                    |
| Gradient clipping threshold    | 256.0           | 1024.0             | 512.0           | 512.0       | 128.0       | 128.0                   |
| GRU observation embed size     | -               | -                  | 1024            | -           | 512         | 512                     |
| GRU size                       | -               | -                  | 96              | -           | 512         | 96                      |
| Learning rate                  | 0.0001          | 4e-05              | 0.0004          | 0.0001      | 0.0001      | 0.0004                  |
| Reward scale factor            | 4.0             | 32.0               | 32.0            | 8.0         | 32.0        | 8.0                     |
| WMG attention head size        | 24              | 16                 | -               | 16          | -           | -                       |
| WMG attention heads            | 4               | 10                 | -               | 12          | -           | -                       |
| WMG Memos                      | 1               | 0                  | -               | 1           | -           | -                       |
| WMG Memo size                  | 64              | -                  | -               | 256         | -           | -                       |
| WMG hidden layer size          | 64              | 64                 | -               | 32          | -           | -                       |
| WMG layers                     | 4               | 4                  | -               | 1           | -           | -                       |

**Working Memory Graphs**

---

Table 7. Tuned hyperparameter settings for BabyAI Level 2 - GoToRedBallGrey.

|                                | <b>WMG<br/>factored</b> | <b>nr-WMG<br/>factored</b> | <b>GRU<br/>factored</b> | <b>WMG<br/>flat</b> | <b>GRU<br/>flat</b> | <b>CNN+GRU<br/>native 7x7x3</b> |
|--------------------------------|-------------------------|----------------------------|-------------------------|---------------------|---------------------|---------------------------------|
| Actor-critic hidden layer size | 4096                    | 2048                       | 4096                    | 4096                | 4096                | 64                              |
| A3C $t_{max}$                  | 8                       | 6                          | 16                      | 1                   | 1                   | 1                               |
| Adam eps                       | 1e-06                   | 1e-08                      | 1e-10                   | 1e-10               | 1e-06               | 0.0001                          |
| CNN hidden channel size 1      | -                       | -                          | -                       | -                   | -                   | 12                              |
| CNN hidden channel size 2      | -                       | -                          | -                       | -                   | -                   | 24                              |
| CNN hidden channel size 3      | -                       | -                          | -                       | -                   | -                   | 192                             |
| Discount factor $\gamma$       | 0.8                     | 0.9                        | 0.8                     | 0.9                 | 0.9                 | 0.95                            |
| Entropy term strength $\beta$  | 0.01                    | 0.02                       | 0.01                    | 0.005               | 0.005               | 0.02                            |
| Gradient clipping threshold    | 1024.0                  | 512.0                      | 1024.0                  | 128.0               | 64.0                | 64.0                            |
| GRU observation embed size     | -                       | -                          | 4096                    | -                   | 2048                | 256                             |
| GRU size                       | -                       | -                          | 96                      | -                   | 512                 | 64                              |
| Learning rate                  | 0.0001                  | 0.00025                    | 0.0001                  | 2.5e-05             | 2.5e-05             | 0.0004                          |
| Reward scale factor            | 8.0                     | 4.0                        | 4.0                     | 4.0                 | 4.0                 | 2.0                             |
| WMG attention head size        | 64                      | 48                         | -                       | 64                  | -                   | -                               |
| WMG attention heads            | 4                       | 1                          | -                       | 3                   | -                   | -                               |
| WMG Memos                      | 1                       | 0                          | -                       | 8                   | -                   | -                               |
| WMG Memo size                  | 32                      | -                          | -                       | 64                  | -                   | -                               |
| WMG hidden layer size          | 16                      | 24                         | -                       | 384                 | -                   | -                               |
| WMG layers                     | 3                       | 3                          | -                       | 1                   | -                   | -                               |

Table 8. Tuned hyperparameter settings for BabyAI Level 3 - GoToRedBall.

|                                | <b>WMG<br/>factored</b> | <b>nr-WMG<br/>factored</b> | <b>GRU<br/>factored</b> | <b>WMG<br/>flat</b> | <b>GRU<br/>flat</b> | <b>CNN+GRU<br/>native 7x7x3</b> |
|--------------------------------|-------------------------|----------------------------|-------------------------|---------------------|---------------------|---------------------------------|
| Actor-critic hidden layer size | 4096                    | 2048                       | 4096                    | 4096                | 4096                | 4096                            |
| A3C $t_{max}$                  | 1                       | 2                          | 3                       | 1                   | 2                   | 3                               |
| Adam eps                       | 1e-12                   | 0.0001                     | 1e-06                   | 0.0001              | 1e-06               | 0.01                            |
| CNN hidden channel size 1      | -                       | -                          | -                       | -                   | -                   | 12                              |
| CNN hidden channel size 2      | -                       | -                          | -                       | -                   | -                   | 40                              |
| CNN hidden channel size 3      | -                       | -                          | -                       | -                   | -                   | 192                             |
| Discount factor $\gamma$       | 0.95                    | 0.9                        | 0.9                     | 0.9                 | 0.9                 | 0.9                             |
| Entropy term strength $\beta$  | 0.1                     | 0.05                       | 0.1                     | 0.05                | 0.02                | 0.05                            |
| Gradient clipping threshold    | 128.0                   | 128.0                      | 128.0                   | 128.0               | 32.0                | 32.0                            |
| GRU observation embed size     | -                       | -                          | 2048                    | -                   | 4096                | 256                             |
| GRU size                       | -                       | -                          | 192                     | -                   | 512                 | 64                              |
| Learning rate                  | 2.5e-05                 | 6.3e-05                    | 6.3e-05                 | 2.5e-05             | 2.5e-05             | 0.0004                          |
| Reward scale factor            | 8.0                     | 4.0                        | 8.0                     | 8.0                 | 4.0                 | 4.0                             |
| WMG attention head size        | 128                     | 32                         | -                       | 24                  | -                   | -                               |
| WMG attention heads            | 2                       | 8                          | -                       | 12                  | -                   | -                               |
| WMG Memos                      | 2                       | 0                          | -                       | 16                  | -                   | -                               |
| WMG Memo size                  | 128                     | -                          | -                       | 256                 | -                   | -                               |
| WMG hidden layer size          | 64                      | 32                         | -                       | 128                 | -                   | -                               |
| WMG layers                     | 4                       | 4                          | -                       | 1                   | -                   | -                               |

## Working Memory Graphs

Table 9. Tuned hyperparameter settings for BabyAI Level 4 - GoToLocal.

|                                | <b>WMG<br/>factored</b> | <b>nr-WMG<br/>factored</b> | <b>GRU<br/>factored</b> | <b>WMG<br/>flat</b> | <b>GRU<br/>flat</b> |
|--------------------------------|-------------------------|----------------------------|-------------------------|---------------------|---------------------|
| Actor-critic hidden layer size | 2048                    | 2048                       | 1024                    | 512                 | 4096                |
| A3C $t_{max}$                  | 6                       | 3                          | 3                       | 6                   | 4                   |
| Adam eps                       | 1e-12                   | 0.01                       | 1e-06                   | 1e-08               | 1e-12               |
| Discount factor $\gamma$       | 0.5                     | 0.6                        | 0.95                    | 0.5                 | 0.9                 |
| Entropy term strength $\beta$  | 0.1                     | 0.1                        | 0.1                     | 0.02                | 0.02                |
| Gradient clipping threshold    | 512.0                   | 512.0                      | 256.0                   | 256.0               | 512.0               |
| GRU observation embed size     | -                       | -                          | 1024                    | -                   | 512                 |
| GRU size                       | -                       | -                          | 128                     | -                   | 96                  |
| Learning rate                  | 6.3e-05                 | 0.0001                     | 4e-05                   | 2.5e-05             | 4e-05               |
| Reward scale factor            | 32.0                    | 16.0                       | 8.0                     | 16.0                | 2.0                 |
| WMG attention head size        | 128                     | 64                         | -                       | 24                  | -                   |
| WMG attention heads            | 2                       | 4                          | -                       | 16                  | -                   |
| WMG Memos                      | 8                       | 0                          | -                       | 16                  | -                   |
| WMG Memo size                  | 32                      | -                          | -                       | 64                  | -                   |
| WMG hidden layer size          | 32                      | 48                         | -                       | 16                  | -                   |
| WMG layers                     | 4                       | 3                          | -                       | 2                   | -                   |

Table 10. Tuned hyperparameter settings for BabyAI Level 5 - PickupLoc.

|                                | <b>WMG<br/>factored</b> | <b>nr-WMG<br/>factored</b> |
|--------------------------------|-------------------------|----------------------------|
| Actor-critic hidden layer size | 512                     | 2048                       |
| A3C $t_{max}$                  | 12                      | 12                         |
| Adam eps                       | 1e-10                   | 1e-10                      |
| Discount factor $\gamma$       | 0.7                     | 0.8                        |
| Entropy term strength $\beta$  | 0.02                    | 0.05                       |
| Gradient clipping threshold    | 512.0                   | 512.0                      |
| Learning rate                  | 0.0001                  | 6.3e-05                    |
| Reward scale factor            | 8.0                     | 8.0                        |
| WMG attention head size        | 24                      | 48                         |
| WMG attention heads            | 10                      | 6                          |
| WMG Memos                      | 8                       | 0                          |
| WMG Memo size                  | 32                      | -                          |
| WMG hidden layer size          | 128                     | 96                         |
| WMG layers                     | 2                       | 2                          |

Table 11. Tuned hyperparameter values on Sokoban. The resulting model contained 4,508,182 trainable parameters.

|                                  |        |
|----------------------------------|--------|
| Reward per step                  | 0      |
| Reward on success                | 2      |
| Actor-critic hidden layer size   | 2880   |
| A3C $t_{max}$                    | 4      |
| Adam eps                         | 1e-10  |
| Discount factor $\gamma$         | 0.995  |
| Entropy term strength $\beta$    | 0.02   |
| Gradient clipping threshold      | 512.0  |
| Learning rate                    | 1.6e-5 |
| Learning rate annealing $\gamma$ | 0.98   |
| Reward scale factor              | 4      |
| WMG attention head size          | 32     |
| WMG attention heads              | 8      |
| WMG Memos                        | 1      |
| WMG Memo size                    | 2048   |
| WMG hidden layer size            | 8      |
| WMG layers                       | 10     |

Table 12. Additional details for Pathfinding experiments of 20M steps.

| Models & algorithms         | Final performance | Trainable parameters | Training speed |
|-----------------------------|-------------------|----------------------|----------------|
| <i>Depth-(n-1)</i> baseline | 100.0% of reward  |                      |                |
| <i>Depth-3</i> baseline     | 99.7% of reward   |                      |                |
| <i>Depth-2</i> baseline     | 97.6% of reward   |                      |                |
| <i>Depth-1</i> baseline     | 86.9% of reward   |                      |                |
| nr-WMG, full-history        | 99.6% of reward   | 204,963              | 96 steps/sec   |
| WMG                         | 99.6% of reward   | 132,507              | 91 steps/sec   |
| GRU                         | 94.7% of reward   | 1,139,459            | 291 steps/sec  |

Table 13. Number of trainable parameters, in thousands, for the BabyAI models in Table 1.

| BabyAI level        | WMG      | nr-WMG   | GRU      | WMG   | GRU    | CNN+GRU      |
|---------------------|----------|----------|----------|-------|--------|--------------|
|                     | factored | factored | factored | flat  | flat   | native 7x7x3 |
| 1 - GoToObj         | 636      | 1,864    | 1,572    | 2,053 | 4,170  | 393          |
| 2 - GoToRedBallGrey | 2,997    | 258      | 3,723    | 2,116 | 10,075 | 140          |
| 3 - GoToRedBall     | 3,418    | 2,217    | 3,749    | 3,229 | 15,126 | 709          |
| 4 - GoToLocal       | 2,235    | 1,960    | 1,137    | 2,022 | 1,479  | —            |
| 5 - PickupLoc       | 879      | 2,007    | —        | —     | —      | —            |

Table 14. Training steps per second on a fixed machine, for the BabyAI models in Table 1.

| BabyAI level        | WMG      | nr-WMG   | GRU      | WMG  | GRU  | CNN+GRU      |
|---------------------|----------|----------|----------|------|------|--------------|
|                     | factored | factored | factored | flat | flat | native 7x7x3 |
| 1 - GoToObj         | 38       | 28       | 146      | 111  | 86   | 149          |
| 2 - GoToRedBallGrey | 58       | 113      | 147      | 35   | 18   | 88           |
| 3 - GoToRedBall     | 18       | 32       | 78       | 25   | 20   | 87           |
| 4 - GoToLocal       | 44       | 48       | 132      | 54   | 134  | —            |
| 5 - PickupLoc       | 81       | 84       | —        | —    | —    | —            |

Table 15. BabyAI baseline agent sample efficiencies, defined as the amount of training (in either episodes or environment interaction steps) required for the agent to solve 99% of random episodes within 64 steps. The published results are the means of the min & max RL sample efficiencies reported in Table 3 of [Chevalier-Boisvert et al. \(2018\)](#). We obtained the replicated results, which are the medians over 10 training runs, using the code and default hyperparameter settings from the open source release of the BabyAI baseline agent. We report these sample efficiencies in terms of both episodes and environment interactions. All numbers are in thousands.

| BabyAI level        | Instruction template                | Published<br>(episodes) | Replicated<br>(episodes) | Replicated<br>(env interactions) |
|---------------------|-------------------------------------|-------------------------|--------------------------|----------------------------------|
| 1 - GoToObj         | GO TO ⟨color⟩ ⟨object⟩              | —                       | 19                       | 333                              |
| 2 - GoToRedBallGrey | GO TO RED BALL                      | 17                      | 16                       | 282                              |
| 3 - GoToRedBall     | GO TO RED BALL                      | 297                     | 283                      | 3,674                            |
| 4 - GoToLocal       | GO TO ⟨color⟩ ⟨object⟩              | 1008                    | 1,064                    | 16,422                           |
| 5 - PickupLoc       | PICK UP ⟨color⟩ ⟨object⟩ ⟨location⟩ | 1,545                   | 1,557                    | 25,574                           |
